# Supplementary material for: Antibiotic-associated dysbiosis affects the ability of the gut microbiota to control intestinal inflammation upon fecal microbiota transplantation in experimental colitis models
Source: PubMed Central journal article supplement (PMC7868014; doi:10.1186/s40168-020-00991-x), 2021-02-06

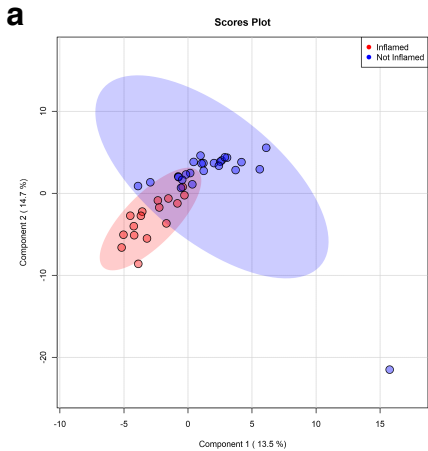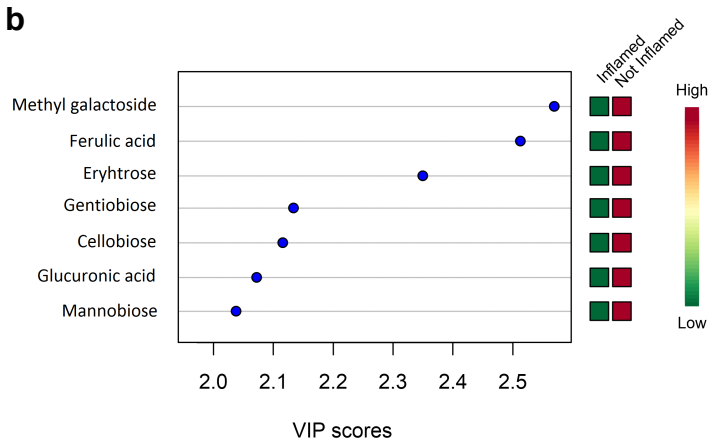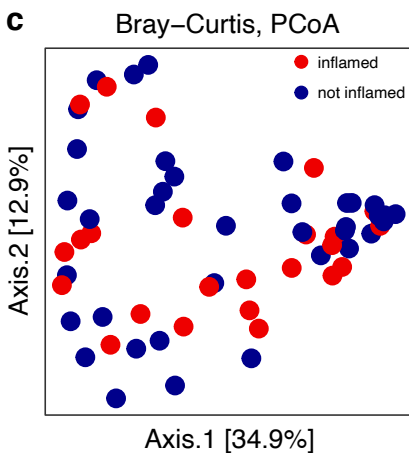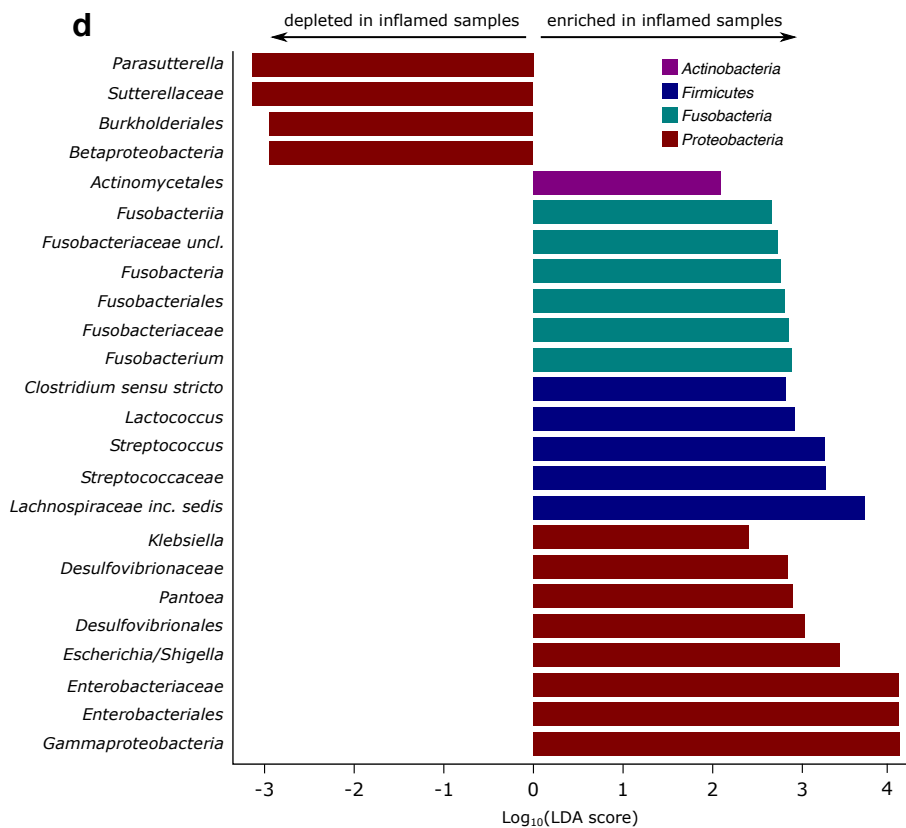

Supplement: 40168_2020_991_MOESM2_ESM.pdf [file 40168_2020_991_MOESM2_ESM.pdf]
