# Supplementary material for: Antibiotic-associated dysbiosis affects the ability of the gut microbiota to control intestinal inflammation upon fecal microbiota transplantation in experimental colitis models
Source: PubMed Central journal article supplement (PMC7868014; doi:10.1186/s40168-020-00991-x), 2021-02-06
Supplement: 40168_2020_991_MOESM3_ESM.pdf [file 40168_2020_991_MOESM3_ESM.pdf]

**Table S1: FACS antibodies and dyes**

| <b>mAbs</b> | <b>clone</b> | <b>Supplier</b> |
|-------------|--------------|-----------------|
| CD45.2      | 104          | Biolegend       |
| CD3         | 17A2         | BD              |
| CD4         | GK1.5        | BD              |
| CD11c       | HL3          | BD              |
| CD19        | 1D3          | BD              |
| CD11b       | M1/70        | BD              |
| F4/80       | BM8          | Biolegend       |
| Ly6g        | 1A8          | Biolegend       |
| Ly6c        | AL-21        | eBioscience     |
| MHC-II      | M5/114.15.2  | eBioscience     |
| Ki67        | 16A8         | Biolegend       |
| <b>hAbs</b> | <b>clone</b> | <b>Supplier</b> |
| CD3         | UCHT1        | TONBO           |
| CD4         | SK3          | eBioscience     |
| CD11c       | 3.9          | Biolegend       |
| HLA-DR      | LN3          | eBioscience     |
| CD14        | M5E2         | Biolegend       |
| IL10        | JES3-9D7     | eBioscience     |
| IL17A       | eBio64DEC17  | eBioscience     |
| INFg        | 4S.B3        | BD              |
| Tetramer    |              | NIH             |
| Zombie Dye  |              | Biolegend       |
