# Supplementary material for: Antibiotic-associated dysbiosis affects the ability of the gut microbiota to control intestinal inflammation upon fecal microbiota transplantation in experimental colitis models
Source: PubMed Central journal article supplement (PMC7868014; doi:10.1186/s40168-020-00991-x), 2021-02-06
Supplement: 40168_2020_991_MOESM4_ESM.pdf [file 40168_2020_991_MOESM4_ESM.pdf]

**Table S2:** PERMANOVA of beta-diversity analysis as measured by Bray-Curtis dissimilarity

|                                                                     | <b>F</b> | <b>R<sup>2</sup></b> | <b>p-value</b> |
|---------------------------------------------------------------------|----------|----------------------|----------------|
| DSS vs DSS <sup>FMT</sup>                                           | 2.404786 | 0.051822             | 0.028          |
| DSS vs DSS <sup>FMT+Metronidazole</sup>                             | 3.575931 | 0.192503             | 0.003          |
| DSS vs DSS <sup>FMT+Streptomycin</sup>                              | 2.890872 | 0.161584             | 0.004          |
| DSS vs DSS <sup>FMT+Vancomycin</sup>                                | 2.147415 | 0.151788             | 0.038          |
| DSS <sup>FMT</sup> vs DSS <sup>FMT+Metronidazole</sup>              | 7.579476 | 0.162721             | 0.001          |
| DSS <sup>FMT</sup> vs DSS <sup>FMT+Streptomycin</sup>               | 6.226671 | 0.137677             | 0.001          |
| DSS <sup>FMT</sup> vs DSS <sup>FMT+Vancomycin</sup>                 | 4.798523 | 0.117615             | 0.003          |
| DSS <sup>FMT+Metronidazole</sup> vs DSS <sup>FMT+Streptomycin</sup> | 1.8961   | 0.15939              | 0.052          |
| DSS <sup>FMT+Metronidazole</sup> vs DSS <sup>FMT+Vancomycin</sup>   | 2.766451 | 0.283261             | 0.014          |
| DSS <sup>FMT+Streptomycin</sup> vs DSS <sup>FMT+Vancomycin</sup>    | 2.268719 | 0.244772             | 0.013          |
